# Supplementary material
Source: publisher site journal article supplement (https://www.spandidos-publications.com/5412/downloadSupplementary)

Figure S1. Model of rapamycin-induced changes in Hspb1-related pathways. Tsc, tuberous sclerosis complex; Hspb1, heat shock protein family B (small) member 1.

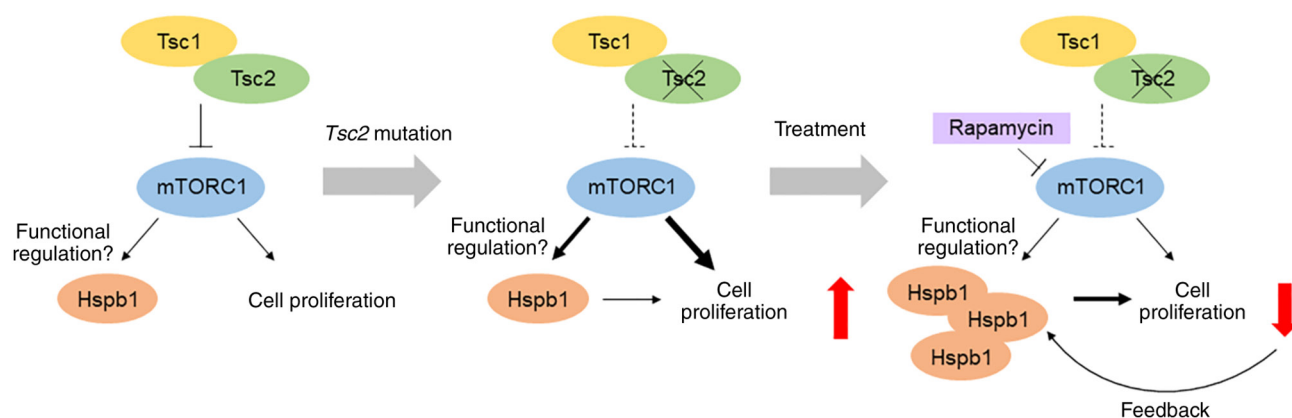

Supplement: Supplementary file 1 [file downloadSupplementary]
